# Supplementary material
Source: HighWire-hosted journal article supplement (https://www.canjsurg.ca/highwire/filestream/97756/field_highwire_adjunct_files/0/CJS-022320-at-1.pdf)
Supplement: CJS-022320-at-1.pdf [file CJS-022320-at-1.pdf]

**Appendix 1** to Zwiep TM, Helewa RM, Robertson R, et al. Preoperative stoma site marking for fecal diversions (ileostomy and colostomy): position statement of the Canadian Society of Colon and Rectal Surgeons and Nurses Specialized in Wound, Ostomy and Continence Canada. *Can J Surg* 2022. Copyright © 2022 The Author(s) or their employer(s). To receive this resource in an accessible format, please contact us at [cmajgroup@cmaj.ca](mailto:cmajgroup@cmaj.ca).

DOI: 10.1503/cjs.022320

*Online appendices are unedited and posted as supplied by the authors.*

## **Appendix 1. Literature search strategy**

- 1 ((ostomy or stoma) adj2 (siting\$ or markings\$)).mp. (68)
- 2 (site marking\$ or site siting\$).mp. (113)
- 3 ((preoperative or pre-operative) adj10 (stoma or stomas or ostom\$ or colostom\$ or ileostom\$)).mp. (375)
- 4 ((preoperative or pre-operative) adj2 (marking\$ or siting\$)).mp. (305)
- 5 ((ostom\$ or stoma or stomas or colostom\$ or ileostom\$) adj3 (site\$ or siting\$ or marking\$) adj3 (creat\$ or select\$ or construct\$)).tw. (27)
- 6 or/1-5 (756)
- 7 Surgical Stomas/ (1635)
- 8 colostomy/ or ileostomy/ (13600)
- 9 Colorectal Surgery/ (3055)
- 10 (stoma or stomas).tw. (8987)
- 11 (colostom\$ or ileostom\$).tw. (12929)
- 12 ((colorectal or colon or rectal) adj3 surger\$).mp. (16273)
- 13 ((fecal or bowel or intestinal) adj2 diversion\$).mp. (772)
- 14 or/7-13 (41494)
- 15 Postoperative Complications/ (343525)
- 16 ((postoperative or post-operative) adj2 complication\$).mp. (383431)
- 17 ((stoma or stomas or ostom\$ or colostom\$ or ileostom\$) adj5 complication\$).mp. (1499)
- 18 "Quality of Life"/ (172589)
- 19 "quality of life".tw. (236360)

**Appendix 1** to Zwiep TM, Helewa RM, Robertson R, et al. Preoperative stoma site marking for fecal diversions (ileostomy and colostomy): position statement of the Canadian Society of Colon and Rectal Surgeons and Nurses Specialized in Wound, Ostomy and Continence Canada. *Can J Surg* 2022. Copyright © 2022 The Author(s) or their employer(s). To receive this resource in an accessible format, please contact us at [cmajgroup@cmaj.ca](mailto:cmajgroup@cmaj.ca).

DOI: 10.1503/cjs.022320

*Online appendices are unedited and posted as supplied by the authors.*

20 (patient adj3 outcome\$.tw. (76020)

21 or/15-20 (728387)

22 6 and 14 and 21 (198)

23 (urostom\$ or urinary diversion\$ or ileoconduit\$ or ileal conduit\$ or ureterostom\$.ti.  
(3174)

24 (child\$ or pediatric\$ or paediatric\$.ti. (836349)

25 23 or 24 (839346)

26 22 not 25 (192)

27 limit 26 to (yr="2008 -Current" and (english or french)) (110)

28 remove duplicates from 27 (110)
